# Supplementary material
Source: publisher site journal article supplement (https://www.dovepress.com/get_supplementary_file.php?f=380780.docx)
Supplement: Supplementary file 1 [file get_supplementary_file.php]

Appendix – Examples of the Coding Process

**Translation of Transcript-Participant No. 235**

**Interviewer:** I am very glad to see you complete the half year Tai Chi class. Many thanks for your cooperation. In the coming minutes, I will ask you several questions on your experience, feeling and feedback about the Tai Chi program. Could you please introduce your health status before you starting the Tai Chi class?

**Participant No. 235**: Sure. It’s like this. I was diagnosed as atrial fibrillation by the doctor. The doctor introduced and I was invited to participate in this program, so I came. At the beginning, I was a layman for Tai Chi because I haven't learnt it before. So I was a zero beginner at first and it was a process that I came to Tai Chi. In the learning process, I gradually entered the door of Tai Chi because of the patience, earnest, serious and responsible instruction of the Tai Chi instructor. We practiced step by step, according to the requirements of the Tai Chi instructor. Firstly, we practiced the 13-Form Thumping Techniques. After practicing the 13-Form Thumping Techniques, I feel, most importantly, I need to calm down. Another thing is, when I practice Tai Chi I should get rid of my wandering ideas. The wandering mind is not good for my health. I think the major function of the 13-Form Thumping Techniques is helping me to calm down. After calming down, you need to realize the essence. I think these two points played the major function. In addition, when practice the 13-Form Thumping Techniques you will get the benefits, gradually, not immediately. I experienced it. At the beginning, although I sit there when I practiced the 13-Form Thumping Techniques, my mind was wandering. I didn’t know what I was thinking, right? Hehehe, I couldn’t calm down and be mindful. Since I have been busy in working at Australia for around thirty years, at the beginning it is difficult for me that I suddenly came to this quiet environment to practice the 13-Form Thumping Techniques. However, it is hard and it is easy. If you really want to enter the door and realize the essence of the 13-Form Thumping Techniques, I think it needs time. During the half year of learning, I gradually know myself better, which is beneficial to my health.

**Interviewer:** I am very glad that you share it with me. Hehehe. How did you know about Tai Chi before your participation in this program?

**Participant No. 235**: As I mentioned before, when I received the invitation I was a layman of Tai Chi. Hehehe, I actually know nothing about Tai Chi. Hehehe, the reason why I can continue to learn it for a half year, there are two factors, two premises, I think they play the most important roles. Firstly, I met a good teacher. She taught us Tai Chi patiently and seriously. In addition, after the instruction of each movement, she explained the potential effects of each movement for the body, which enhanced my understanding of Tai Chi. Secondly, although I haven’t learnt Tai Chi before, I know Tai Chi is the essence of the thousands of years of Chinese culture legacy, and part of the treasure of Chinese culture. Promoting Tai Chi in Australia is a promotion of Chinese culture. Moreover, our Tai Chi instructor taught us diligently, earnestly, seriously, and patiently. So I had a deeper understanding of Tai Chi and became more interested in learning Tai Chi.

**Interviewer:** Thanks for sharing with me. What was your expectation for participating in this program?

**Participant No. 235**: As I always say,at the beginning I was a zero beginner. For my health, hehehehe, I wanted to try and see whether it can help me. Hehehe, I wanted to try and see what on earth is Tai Chi? I heard that Tai Chi could be beneficial for this or that, for health, for peaceful mind and calm, so I participated in this program*.* Through the half year of learning, I felt Tai Chi indeed could help calm down the mind. It was my main experience. Once calming down the mind, one’s spiritual world would be unconventional.

**Interviewer:** Yeah. Many things come very naturally after that.

**Participant No. 235**: Yeah. Many things come naturally. Once calming down the mind, one will think and then a comprehension and understanding comes out. The environment of Tzu Chi Foundation is good. When we enter the front gate, we will see the couplet reads “The Jing Si Dharma-lineage is a path of diligent spiritual practice; the Tzu Chi School of Buddhism is a road through the world”. It requires beyond the worldly fickleness, completely calm down the mind and heart, return back to nature, and return back to human pure nature. “Man’s nature at birth is good”.

**Interviewer:** Practicing Tai Chi is doing subtraction.

**Participant No. 235**: This process is it doesn’t happen at once, and it needs slowly learn and experience it. In addition, I would like to repeat it again; it is such an honour for us to have such a serious and dedicated teacher.

**Interviewer:** Thanks. Did participating in the Tai Chi program have any impacts on your daily life?

**Participant No. 235**: Yes, there are some changes. When I, if, learn Tai Chi at the class, because some movements, there are two parts, I want to say. I learn Tai Chi for 2 hours each class, and because the movements are not easy to master, so when I come back home I continue to practice again and again. Gradually, I merged the things I learnt from the teacher to my own movements. There are always some parts I am not familiar with. It is not possible I stop learning at home after the 2-hour learning at class. It’s not possible. It’s one hand of the learning and practicing process. Another hand, I think it plays the major role. When I was in trouble, when I felt moody, or when I was angry, I would think what my Tai Chi teacher said. I mean Tai Chi can help one to calm down. Then I would do what my Tai Chi teacher told me. What is it? I would do standing postures. Standing posture, it is easy to say, and it seems easy to do. However, it you can truly carry out standing posture and calm down the mind, it needs perseverance. I would think what my teacher told me; sometimes I closed my eyes when doing standing posture, and try not to think anything. By doing so, I can gradually calm down my fickle mind and become not easy to lose my temper. I would do as much as I can. It reduced my unnecessary stress and helped me a lot. After this, I would practice Tai Chi. Actually, what I think the process of practicing Tai Chi? I think it is an activity which gradually improve one’s lifestyle. It can bring you into a quiet and peaceful world. It is beneficial for my mental and emotional health. Especially, for people like me who have some problem with heart and atrial fibrillation, When I feel unwell because of atrial fibrillation, I will practice Tai Chi immediately. I practice it slowly, feel it slowly, and gradually calm down myself.

**Interviewer:** I know you are handling some issues of your company and it is a stress for you. Were there any benefits from practicing in the Tai Chi program on coping with stress or any other feelings?

**Participant No. 235**: I think Tai Chi is the main facilitator for me to deal with my stress. Tai Chi, as I mentioned before, the main effect of Tai Chi is helping people to calm down and become quiet. No matter how great the stress you bear, if you integrate the essence of Tai Chi into your blood and put it into your practice, you will gradually digest the stress. But how can you digest the stress? It depends on your daily practice, step by step, continuous practice. Tai Chi will help you to some extent.

**Interviewer:** Did participating in the Tai Chi program have any influence on your social life?

**Participant No. 235**: It’s related to the essence of Tai Chi. Tai Chi itself can help people to calm down. To some extent, Tai Chi helps to deal with the relationships between people and people, people and things, and people and family.

**Interviewer:** Would you recommend the Tai Chi program to other cardiovascular patients? I would like to see whether you are satisfied with the Tai Chi program.

**Participant No. 235**: Satisfied. The teacher taught us such seriously and dedicatedly, with compassion. We are very satisfied during the learning process. The only thing is, is it possible that we can learn more movements than just the 13 movements? It seems the time to practice the 13-form Tai Chi is a bit short. It takes around three minutes. Sometimes it takes only two minutes because the speed of different people is different. Is it possible we extend a bit longer and add more movements, according to the health status of older people?

**Interviewer:** Yes. We actually have more forms, such as24-form and 83-form. The reason why we provide the 13-form Tai Chi here because it is not hard to practice for one time and you can practice anytime. So it takes not too much effort to remember the movements. It is easy to remember the movements and sequence. However, the practice needs to be correct and master the essence. The key is not about how many movements you practice. The key is how to practice the movement correctly and feel how to use the mind to lead the qi and blood and the movement of whole body.

**Participant No. 235**: What you said reminder me about my experience and feeling at first. At the beginning, I thought, wow, so many things, so many movements, 13 movements, I can’t learn it. When the teacher asked us ‘Did you get it’, I always the first one to say ‘No’. Hehehe, however, after a half year of learning, I mastered the 13 movements. Then I have higher requirements to myself. I have a higher goal to achieve, so I think the 13 movements are not enough for me. Hehehe, is it possible to add more movement? What does this mean? It’s hard at the beginning. It means the process of learning Tai Chi for me is that I had no idea of Tai Chi at first and gradually entered the door of Tai Chi. After I know the basics of Tai Chi, wow, I see, Tai Chi is such an unlimited world. So I gradually know Tai Chi, gradually entered the role, and have higher and higher goals. So, I proposed my expectation to you about adding more movements. Of course, my idea may be wrong.

**Interviewer:** Sure. We have many forms. We hope our students not only learn the movements but also go deeper. Could each movement, especially the junctions between movements be practiced very smoothly? The first requirement is changing the hardness into softness. The body becomes flexible and the heart tender.

**Participant No. 235**: Hehehe, I am not flexible. I am inflexible. As you can see, my Tai Chi performance is inflexible. As I told you just now, I have been in Australia for 30 years. I work every day, and I never go for Tai Chi. I am very happy to see Tai Chi gradually help me soften my inflexible body.

**Interviewer:** Hehehe. So, it is better just practising this form again and again. You can practise it several times. When practise each movement, you can think the principle such as how to move as a whole and how to use the waist as the leader to move the whole body.

**Participant No. 235**: Yeah. I found my mistake and the teacher pointed it out to me too. It is that when I practice Tai Chi I move my hands first not my waist.

**Interviewer:** Hehehe. As we mentioned just now, practicing Tai Chi is doing subtraction. You need to know what dominate the movements. Life is the same. If you find it in Tai Chi, you can find your life is in the same way. What is the most important thing to you? If you master the main thing, other things often come naturally. This rule can be used in our daily life. If we continue to hold a similar Tai Chi class, would you like to recommend other people to practice Tai Chi?

**Participant No. 235**: Yes, definitely. I have a habit that when I want to practice Tai Chi, I don’t mind where it is, even in public space. So when people ask me about Tai Chi, I will definitely recommend it to them. This is a promotion, especially at Australia, a promotion of Chinese traditional Tai Chi culture. I think it is a good deed.

**Interviewer:** Yeah. It is a treasure of Chinese culture. We share it with more people.

**Participant No. 235**: Treasure! Tai Chi is a treasure of our Chinese culture, with a history of thousands of years. Without this belief I don’t think I would join the class. Hehehe.

**Interviewer:** Many thanks for sharing it with me. Would you like to continue the Tai Chi practice after the completion of the study?

**Participant No. 235**: I will definitely continue to practice Tai Chi. For me, Tai Chi and the 13-form Thumping Techniques, I would practice them for the rest of my life. I would say, they will be a part for the rest of my life, an important part.Particularly, for the elderly, it’s much necessary for us to learn Tai Chi and the 13-form Thumping Techniques, so that we can be peace and calm.

**Interviewer:** Great. We also hope to bring Tai Chi to more people. Hope it can become a daily self-care method, and people can continue use it for their health.

**Participant No. 235**: Thanks, many thanks! Tai Chi is such a gift from our teacher. It is a precious wealth for us.

**Interviewer:** What do you think would be the main possible barriers to hindering your future Tai Chi practice?

**Participant No. 235**: So far, it seems no barriers. For now, though, I think there is no factors inhibiting my practice. You can practice Tai Chi anytime anywhere. I often practice it no matter where it is. Particularly, the standing posture you taught us needs no special venue or site, and you can practice it anytime anywhere.

**Interviewer:** Thanks. That’s it. Is there anything else you would like to tell me?

**Participant No. 235**: No. I think I want to say it again. I am so glad to meet such a good teacher. Many thanks!

**Interviewer:** Thanks. Thanks for your perseverance and cooperation.
